# Supplementary material
Source: MDPI journal article supplement (https://www.mdpi.com/2624-8549/3/1/10)
Supplement: s1 [file s1]

Understanding Conformational Polymorphism in Ganciclovir: A Holistic Approach

Lorella Spiteri, Ulrich Baisch and Liana Vella-Zarb

SUPPLEMENTARY MATERIAL

A. Intramolecular Geometry

| Form I |          |       |             |           |         |         |         |               |
|--------|----------|-------|-------------|-----------|---------|---------|---------|---------------|
| Type   | Fragment | Class | Query value | Std. dev. | z-score | Min     | Max     | Local density |
| Length | O1 C2    | Usual | 1.234       | 0.016     | 0.192   | 1.109   | 1.606   |               |
|        | O2 C6    | Usual | 1.421       | 0.012     | 1.013   | 1.388   | 1.423   |               |
|        | C3 N3    | Usual | 1.393       | 0.013     | 0.488   | 1.328   | 1.489   |               |
|        | C4 N4    | Usual | 1.38        | 0.016     | 1.307   | 1.295   | 1.402   |               |
|        | C1 N5    | Usual | 1.325       | 0.013     | 0.171   | 1.233   | 1.374   |               |
|        | C1 N1    | Usual | 1.34        | 0.014     | 0.311   | 1.280   | 1.399   |               |
|        | C2 N2    | Usual | 1.397       | 0.014     | 1.086   | 1.276   | 1.458   |               |
|        | C3 C2    | Usual | 1.423       | 0.036     | 0.64    | 1.376   | 1.755   |               |
|        | C4 N3    | Usual | 1.311       | 0.021     | 0.255   | 1.258   | 1.566   |               |
|        | C5 N4    | Usual | 1.376       | 0.011     | 0.481   | 1.318   | 1.409   |               |
|        | C6 N4    | Usual | 1.441       | 0.012     | 1.964   | 1.437   | 1.493   |               |
|        | O2 C7    | Usual | 1.441       | 0.014     | 0.758   | 1.365   | 1.465   |               |
|        | O3 C8    | Usual | 1.425       | 0.028     | 0.183   | 0.900   | 1.743   |               |
|        | O4 C9    | Usual | 1.435       | 0.028     | 0.513   | 0.900   | 1.743   |               |
|        | C1 N2    | Usual | 1.373       | 0.014     | 0.347   | 1.315   | 1.425   |               |
|        | C5 N5    | Usual | 1.355       | 0.017     | 0.683   | 1.260   | 1.427   |               |
|        | C3 C5    | Usual | 1.382       | 0.023     | 0.090   | 1.302   | 1.683   |               |
|        | C8 C7    | Usual | 1.523       | 0.02      | 0.759   | 1.413   | 1.578   |               |
|        | C9 C7    | Usual | 1.514       | 0.02      | 0.292   | 1.413   | 1.578   |               |
| Angle  | C6 O2 C7 | Usual | 111.837     | 2.516     | 0.310   | 109.984 | 115.79  |               |
|        | C1 N2 C2 | Usual | 126.037     | 1.261     | 0.813   | 119.369 | 129.626 |               |
|        | C4 N3 C3 | Usual | 104.502     | 1.308     | 0.012   | 97.768  | 108.878 |               |
|        | C4 N4 C5 | Usual | 106.591     | 0.581     | 1.370   | 103.748 | 107.003 |               |
|        | C6 N4 C4 | Usual | 126.223     | 1.877     | 0.483   | 123.377 | 130.018 |               |
|        | C6 N4 C5 | Usual | 127.165     | 1.947     | 0.205   | 123.951 | 130.231 |               |
|        | C1 N5 C5 | Usual | 111.95      | 1.263     | 0.311   | 106.601 | 118.886 |               |

|                |                      |       |         |       |       |         |         |       |
|----------------|----------------------|-------|---------|-------|-------|---------|---------|-------|
|                | N1 C1 N5             | Usual | 120.724 | 1.057 | 0.958 | 114.493 | 123.191 |       |
|                | N2 C1 N5             | Usual | 123.382 | 0.979 | 0.177 | 118.174 | 127.867 |       |
|                | N1 C1 N2             | Usual | 115.883 | 1.131 | 0.971 | 113.019 | 122.374 |       |
| <b>Angle</b>   | O1 C2 N2             | Usual | 120.511 | 1.394 | 0.198 | 110.448 | 131.372 |       |
|                | O1 C2 C3             | Usual | 128.586 | 2.473 | 0.811 | 118.952 | 135.102 |       |
|                | C3 C2 N2             | Usual | 110.864 | 2.045 | 0.983 | 101.087 | 117.665 |       |
|                | C2 C3 N3             | Usual | 130.283 | 1.667 | 0.006 | 125.414 | 145.667 |       |
|                | C5 C3 N3             | Usual | 110.688 | 0.994 | 0.166 | 103.817 | 114.763 |       |
|                | C2 C3 C5             | Usual | 118.884 | 1.177 | 0.035 | 109.771 | 122.379 |       |
|                | N4 C4 N3             | Usual | 112.767 | 0.911 | 0.722 | 110.927 | 115.918 |       |
|                | N4 C5 N5             | Usual | 125.782 | 1.189 | 0.065 | 121.55  | 128.166 |       |
|                | C3 C5 N4             | Usual | 105.452 | 0.850 | 0.417 | 102.939 | 107.308 |       |
|                | C3 C5 N5             | Usual | 128.766 | 0.911 | 0.502 | 125.944 | 131.565 |       |
|                | O2 C6 N4             | Usual | 108.565 | 3.710 | 0.358 | 104.013 | 112.842 |       |
|                | O2 C7 C8             | Usual | 108.521 | 3.312 | 0.072 | 102.620 | 114.971 |       |
|                | O2 C7 C9             | Usual | 107.509 | 3.312 | 0.377 | 102.620 | 114.971 |       |
|                | C9 C7 C8             | Usual | 113.436 | 2.278 | 0.153 | 109.692 | 119.817 |       |
|                | O3 C8 C7             | Usual | 111.385 | 2.212 | 0.165 | 105.684 | 123.047 |       |
|                | O4 C9 C7             | Usual | 110.371 | 2.212 | 0.624 | 105.684 | 123.047 |       |
| <b>Torsion</b> | C7 O2 C6 N4          | Usual | 173.405 |       |       |         |         | 0.067 |
|                | O2 C6 N4 C4          | Usual | -98.097 |       |       |         |         | 0.346 |
|                | O2 C6 N4 C5          | Usual | 83.819  |       |       |         |         | 0.406 |
|                | C6 O2 C7 C8          | Usual | -87.481 |       |       |         |         | 0.222 |
|                | C6 O2 C7 C9          | Usual | 149.46  |       |       |         |         | 0.278 |
|                | O2 C7 C8 O3          | Usual | 173.901 |       |       |         |         | 0.281 |
|                | O3 C8 C7 C9          | Usual | -66.691 |       |       |         |         | 0.406 |
|                | O2 C7 C9 O4          | Usual | 46.573  |       |       |         |         | 0.062 |
|                | O4 C9 C7 C8          | Usual | -73.412 |       |       |         |         | 0.312 |
| <b>Ring</b>    | N2 C1 N5 C5<br>C3 C2 | Usual |         |       |       | 0       | 6.136   | 1     |
|                | N3 C3 C5 N4<br>C4    | Usual |         |       |       | 0       | 2.907   | 1     |

**Table A1: Geometric parameters of form I, produced by Mogul. (Organometallic compounds are excluded, R-factor < 7.5%)**

Form II

| Type         | Fragment | Class   | Query value | Std. dev. | z-score | Min     | Max     | Local density |
|--------------|----------|---------|-------------|-----------|---------|---------|---------|---------------|
| <b>Bond</b>  | O1 C2    | Usual   | 1.247       | 0.016     | 0.988   | 1.109   | 1.606   |               |
|              | O2 C6    | Usual   | 1.423       | 0.012     | 1.225   | 1.388   | 1.423   |               |
|              | O3 C8    | Unusual | 1.334       | 0.028     | 3.094   | 0.9     | 1.743   |               |
|              | O4 C9    | Usual   | 1.45        | 0.028     | 1.068   | 0.9     | 1.743   |               |
|              | C1 N2    | Usual   | 1.37        | 0.014     | 0.088   | 1.315   | 1.425   |               |
|              | C1 N5    | Unusual | 1.357       | 0.013     | 2.328   | 1.233   | 1.374   |               |
|              | C3 N3    | Usual   | 1.375       | 0.013     | 0.83    | 1.328   | 1.489   |               |
|              | C5 N4    | Usual   | 1.376       | 0.011     | 0.506   | 1.318   | 1.409   |               |
|              | C1 N1    | Usual   | 1.352       | 0.014     | 1.133   | 1.28    | 1.399   |               |
|              | C5 N5    | Usual   | 1.352       | 0.017     | 0.488   | 1.26    | 1.427   |               |
|              | C3 C5    | Usual   | 1.384       | 0.023     | 0.184   | 1.302   | 1.683   |               |
|              | C2 N2    | Usual   | 1.377       | 0.014     | 0.351   | 1.276   | 1.458   |               |
|              | C4 N3    | Usual   | 1.309       | 0.021     | 0.377   | 1.258   | 1.566   |               |
|              | C6 N4    | Usual   | 1.475       | 0.012     | 0.848   | 1.437   | 1.493   |               |
|              | O2 C7    | Usual   | 1.453       | 0.014     | 1.578   | 1.365   | 1.465   |               |
|              | C8 C7    | Unusual | 1.578       | 0.02      | 3.48    | 1.413   | 1.578   |               |
|              | C9 C7    | Unusual | 1.559       | 0.02      | 2.529   | 1.413   | 1.578   |               |
|              | C4 N4    | Usual   | 1.364       | 0.016     | 0.317   | 1.295   | 1.402   |               |
|              | C3 C2    | Usual   | 1.44        | 0.036     | 0.151   | 1.376   | 1.755   |               |
| <b>Angle</b> | C6 O2 C7 | Usual   | 110.084     | 2.516     | 1.006   | 109.984 | 115.79  |               |
|              | C1 N2 C2 | Usual   | 126.93      | 1.261     | 1.52    | 119.369 | 129.626 |               |
|              | C1 N5 C5 | Usual   | 111.024     | 1.263     | 1.044   | 106.601 | 118.886 |               |
|              | C4 N3 C3 | Unusual | 100.532     | 1.308     | 3.022   | 97.768  | 108.878 |               |
|              | C6 N4 C5 | Usual   | 124.407     | 1.947     | 1.212   | 123.951 | 130.231 |               |
|              | C4 N4 C5 | Usual   | 106.067     | 0.581     | 0.469   | 103.748 | 107.003 |               |
|              | C6 N4 C4 | Usual   | 129.513     | 1.877     | 1.27    | 123.377 | 130.018 |               |
|              | N2 C1 N5 | Usual   | 122.731     | 0.979     | 0.487   | 118.174 | 127.867 |               |
|              | N1 C1 N2 | Usual   | 118.303     | 1.131     | 1.169   | 113.019 | 122.374 |               |
|              | N1 C1 N5 | Usual   | 118.965     | 1.057     | 0.705   | 114.493 | 123.191 |               |
|              | N4 C5 N5 | Usual   | 126.787     | 1.189     | 0.911   | 121.55  | 128.166 |               |
|              | C3 C5 N4 | Unusual | 102.939     | 0.85      | 3.373   | 102.939 | 107.308 |               |
|              | C3 C5 N5 | Unusual | 130.271     | 0.911     | 2.154   | 125.944 | 131.565 |               |

| Type    | Fragment             | Class   | Query value | Std. dev. | z-score | Min     | Max     | Local density |
|---------|----------------------|---------|-------------|-----------|---------|---------|---------|---------------|
| Angle   | C5 C3 N3             | Unusual | 114.498     | 0.994     | 3.998   | 103.817 | 114.763 |               |
|         | C2 C3 N3             | Usual   | 128.055     | 1.667     | 1.331   | 125.414 | 145.667 |               |
|         | C2 C3 C5             | Usual   | 117.376     | 1.177     | 1.316   | 109.771 | 122.379 |               |
|         | O1 C2 N2             | Usual   | 119.51      | 1.394     | 0.52    | 110.448 | 131.372 |               |
|         | O1 C2 C3             | Usual   | 128.763     | 2.473     | 0.882   | 118.952 | 135.102 |               |
|         | C3 C2 N2             | Usual   | 111.629     | 2.045     | 0.609   | 101.087 | 117.665 |               |
|         | N4 C4 N3             | Unusual | 115.918     | 0.911     | 2.737   | 110.927 | 115.918 |               |
|         | O2 C6 N4             | Usual   | 104.298     | 3.71      | 0.792   | 104.013 | 112.842 |               |
|         | O2 C7 C8             | Usual   | 108.998     | 3.312     | 0.072   | 102.62  | 114.971 |               |
|         | O2 C7 C9             | Usual   | 102.62      | 3.312     | 1.853   | 102.62  | 114.971 |               |
|         | C9 C7 C8             | Unusual | 119.817     | 2.278     | 2.954   | 109.692 | 119.817 |               |
|         | O3 C8 C7             | Usual   | 109.406     | 2.212     | 1.06    | 105.684 | 123.047 |               |
|         | O4 C9 C7             | Usual   | 107.514     | 2.212     | 1.915   | 105.684 | 123.047 |               |
| Torsion | C7 O2 C6 N4          | Usual   | 152.753     |           |         |         |         | 0.067         |
|         | O2 C6 N4 C5          | Usual   | -70.847     |           |         |         |         | 0.406         |
|         | O2 C6 N4 C4          | Usual   | 110.66      |           |         |         |         | 0.423         |
|         | C6 O2 C7 C8          | Usual   | -76.568     |           |         |         |         | 0.389         |
|         | C6 O2 C7 C9          | Usual   | 155.41      |           |         |         |         | 0.389         |
|         | O2 C7 C8 O3          | Usual   | -63.152     |           |         |         |         | 0.594         |
|         | O3 C8 C7 C9          | Usual   | 54.469      |           |         |         |         | 0.594         |
|         | O2 C7 C9 O4          | Usual   | -172.345    |           |         |         |         | 0.281         |
|         | O4 C9 C7 C8          | Usual   | 66.805      |           |         |         |         | 0.406         |
| Ring    | N2 C1 N5 C5<br>C3 C2 | Usual   |             |           |         | 0       | 5.925   | 1             |
|         | N3 C3 C5 N4<br>C4    | Usual   |             |           |         | 0       | 3.177   | 1             |

**Table A2: Geometric parameters of form II, produced by *Mogul*. (Organometallic compounds are excluded, R-factor < 7.5%) The configuration in form II can be attributed to the relatively high degree of folding present along the ribose chain, which is characterized by several unusually long bond lengths. When taking into account the full molecular structure of form II, it is understandable how the compromise in the orientation could be afforded because of the resultant stability gained through intramolecular coulombic forces.**

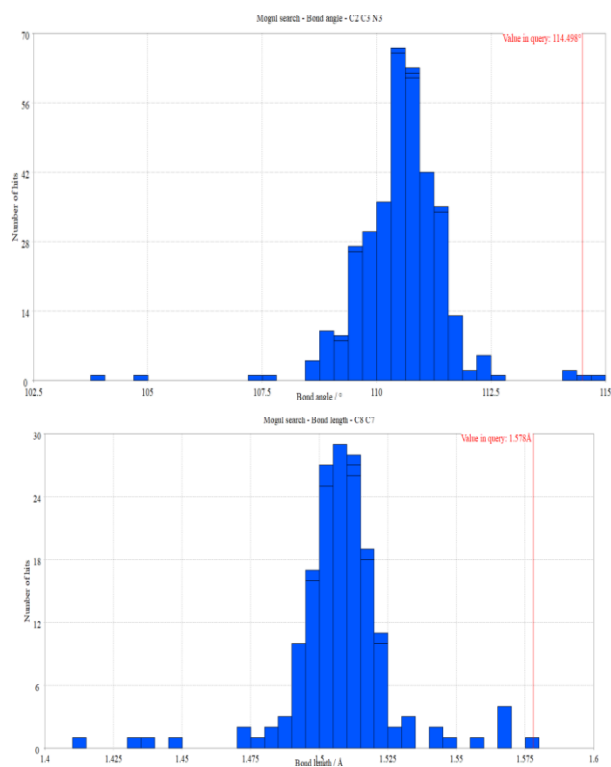

**Figure A3:** Histogram of the Bond angle C5C3N3 and Bond length C8-C7, together with the query value of form II. All 167 fragments were of maximum relevance to form II fragment, with R-factor  $\leq 7.5\%$ .

This suggested that owing to different factors, the molecule of form II compromised its geometric conformation from the usual range of observed parameters, probably due to its high degree of folding.

## B: Electrostatic Potential Maps

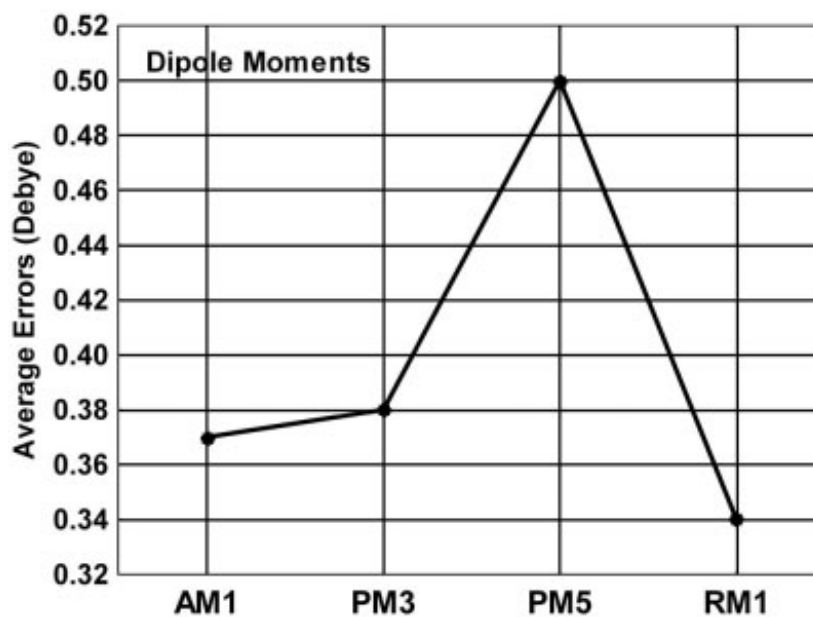

**Figure B1:** The average errors for dipole moments for 127 molecules, calculated by AM1, PM3, PM5 and RM1.<sup>138</sup>

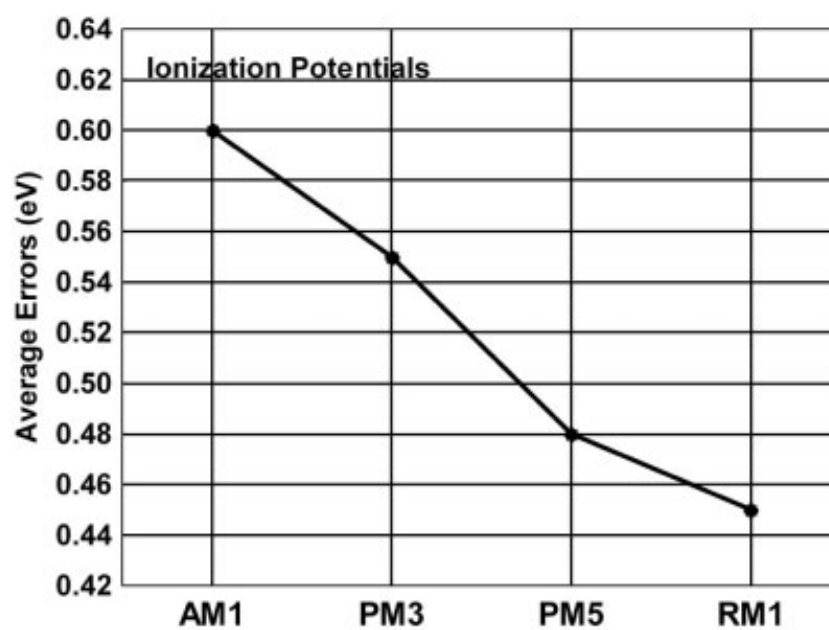

Figure B2: The average errors for ionization potentials for 127 molecules, calculated by AM1, PM3, PM5 and RM1.<sup>138</sup>

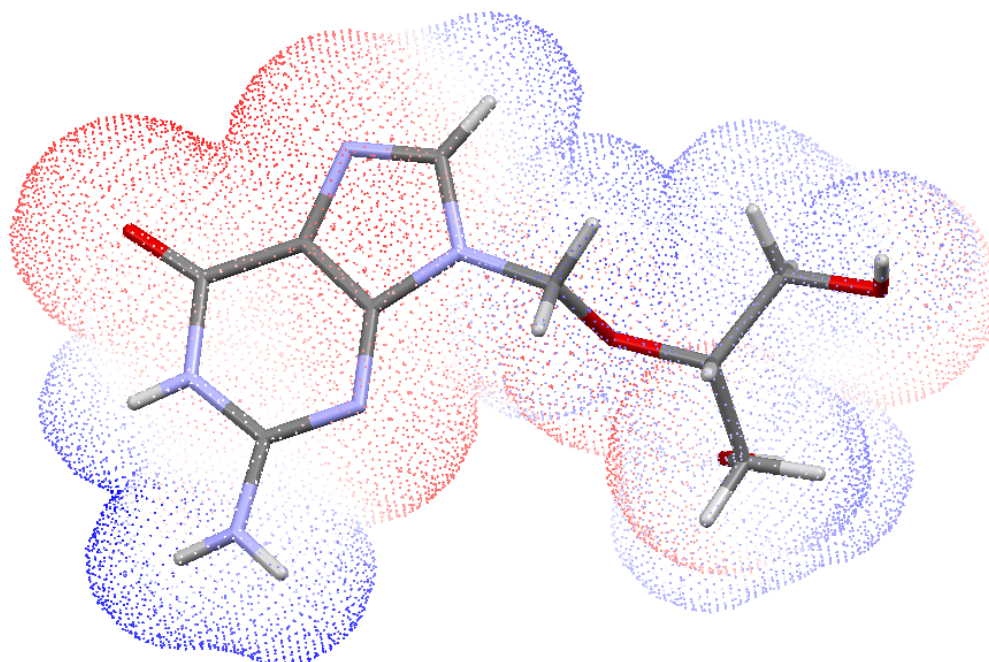

Figure B3: The electrostatic potential map of form II, calculated with RM1 method, through MOPAC interface in *Mercury*.

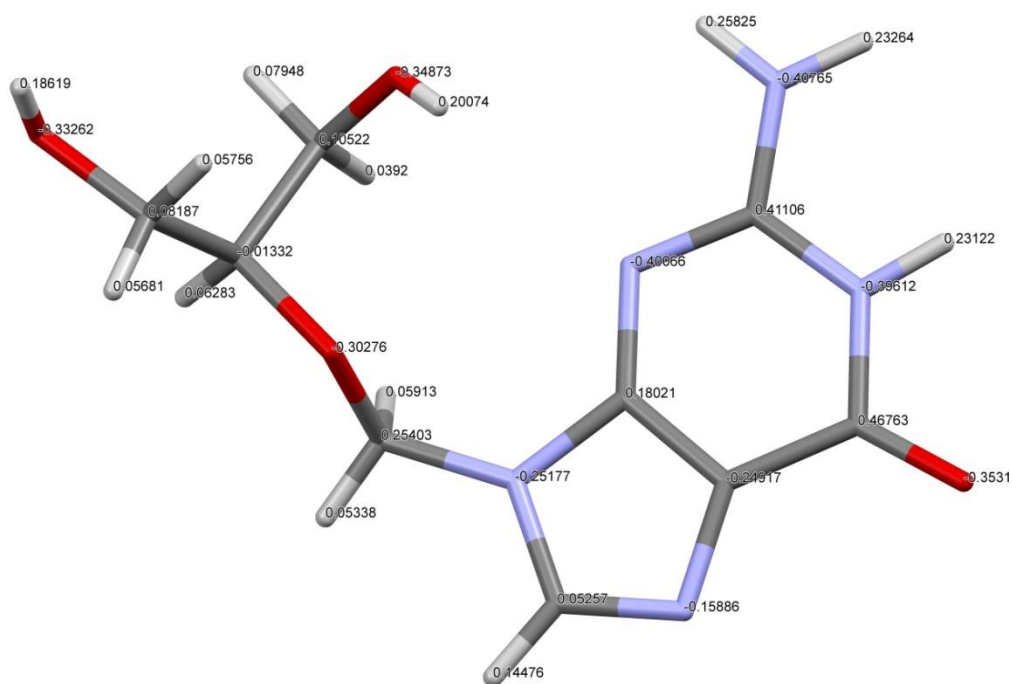

**Figure B4:** The partial charges of form II, calculated with RM1 method, through MOPAC interface in *Mercury*.

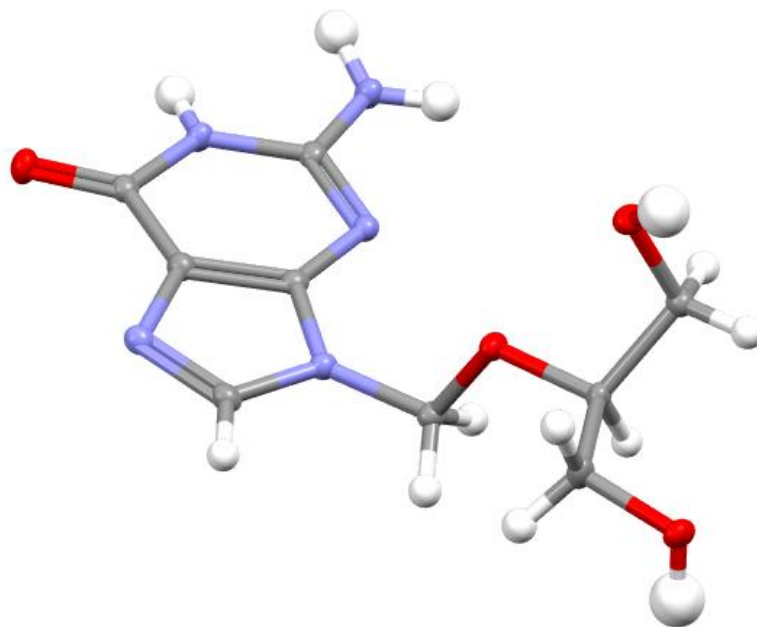

**Figure B5:** Form I displayed with its displacement ellipsoids, drawn in *Mercury*. (Probability level = 50%)

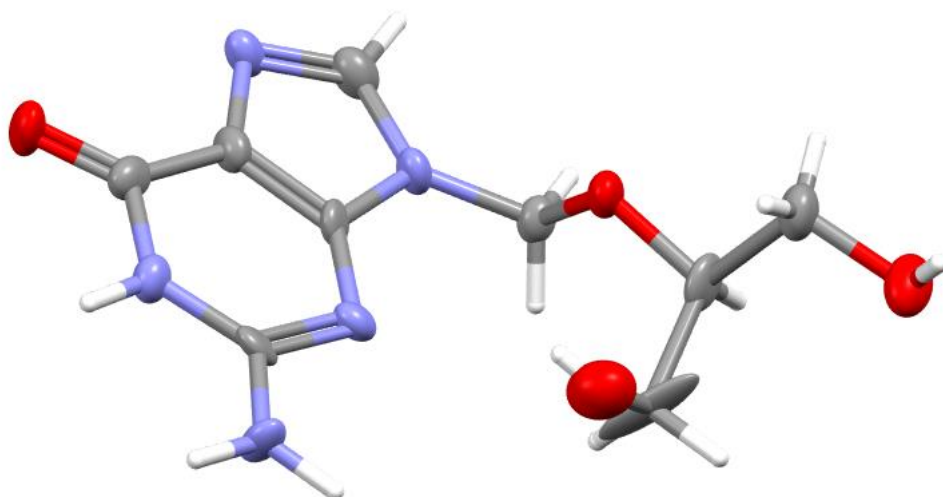

**Figure B6:** Form II displayed with its displacement ellipsoids, drawn in *Mercury*.  
(Probability level = 20%)

### C. Intermolecular Analysis

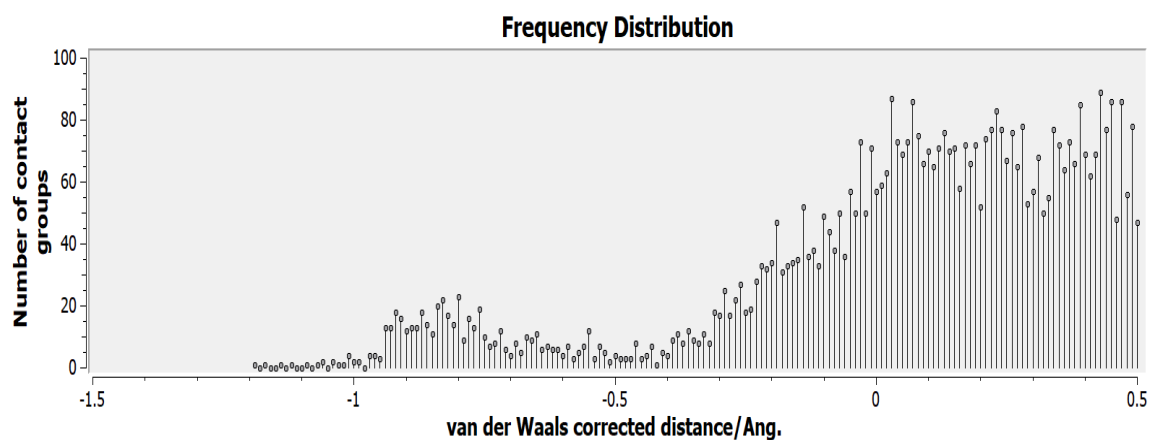

**Figure C1:** Frequency plot showing the distribution of the number of N-H and O-H groups per corrected distance in Å. Contacts with a length less than the sum of VdW radii have negative values, while those with longer lengths have positive values. This figure shows the dominant presence of contacts with relatively longer intermolecular bond, which are commonly considered as weaker contacts.



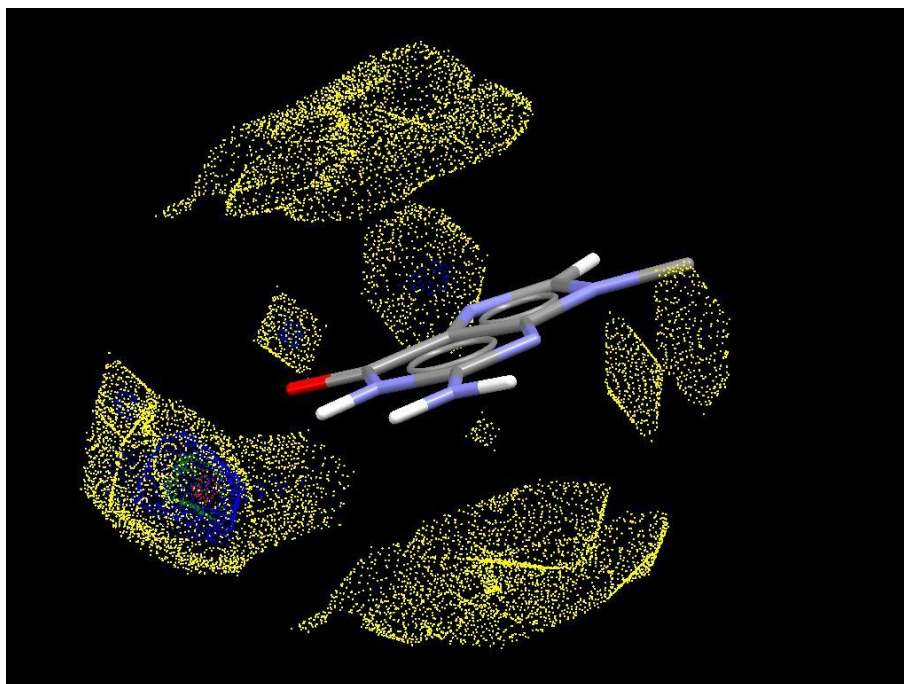

**Figure C2:** Guanine ring system with only carbon as the contact groups. (Internal scaling: Level 10 – Yellow, Level 25 – Blue, Level 50 – Green, Level 75 – Red)

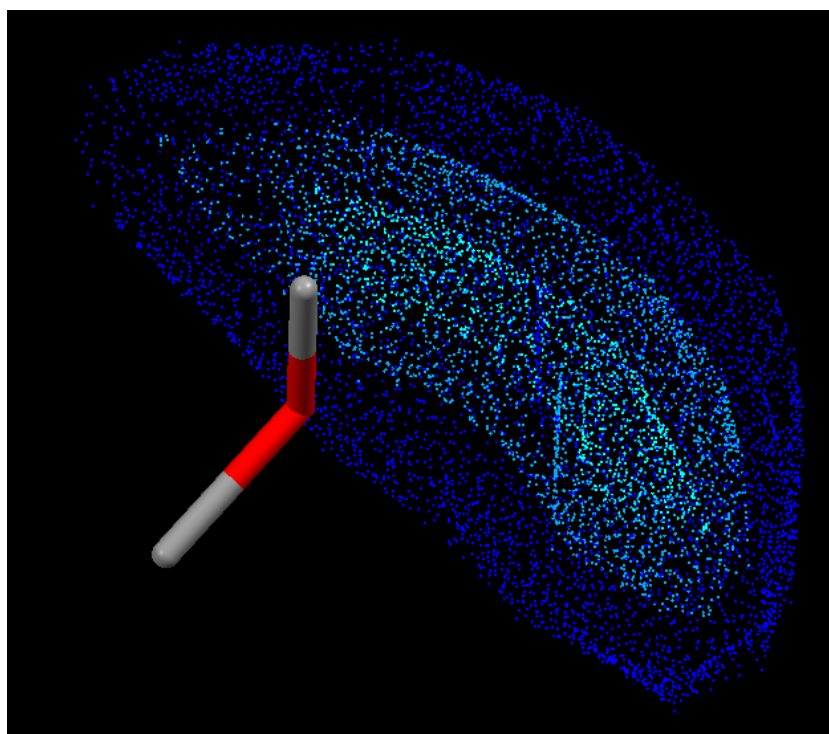

**Figure C3:** Aliphatic ether as the central group, with nitrogen and oxygen atoms as the contact groups. (Internal scaling: Level 25: Dark Blue, Level 50: Lighter Blue, Level 75: Turquoise)

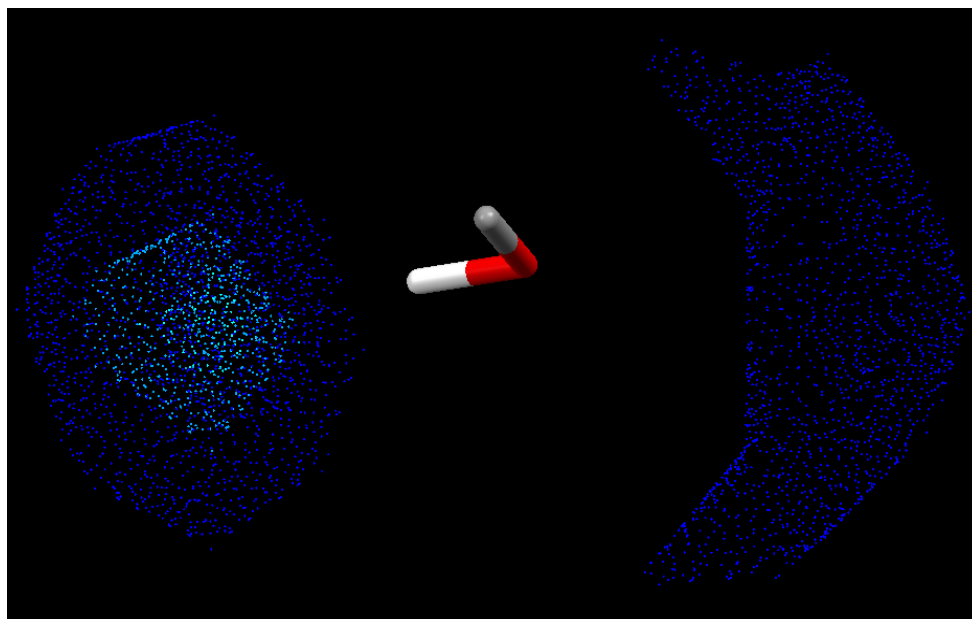

**Figure C4:** *IsoStar* contour plot of aliphatic hydroxyl group, with nitrogen and oxygen as probes (internal scaling as described in C3).

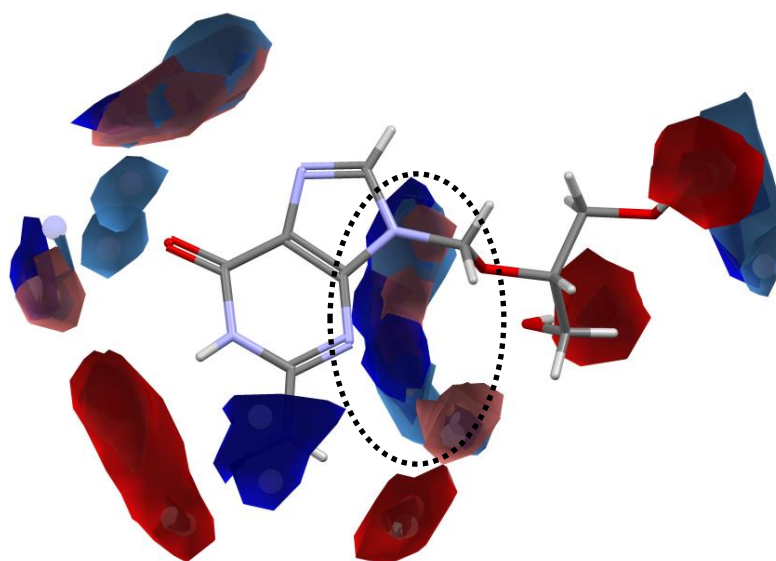

**Figure C5:** Full interaction map of form I, with uncharged NH nitrogen (blue), RNH3 Nitrogen (light blue), alcohol oxygen (light red) and carbonyl oxygen (red), at level 6.0. The circled area marks the intense interaction map around the ether oxygen.

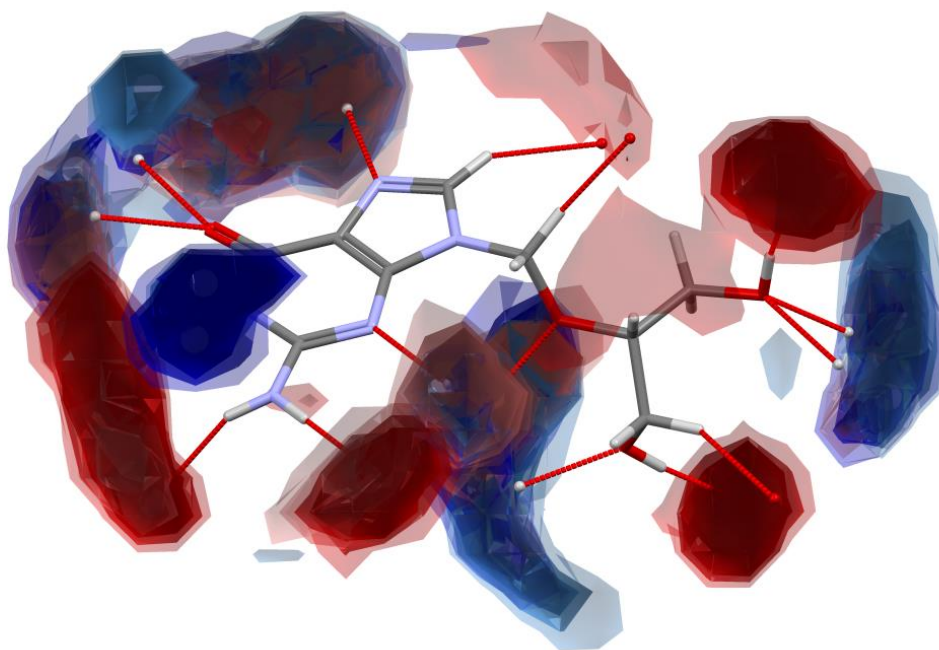

**Figure C6:** Full interaction map of form I, with uncharged NH nitrogen (blue), RNH3 Nitrogen (light blue), alcohol oxygen (light red) and carbonyl oxygen (red), at levels 2, 4 and 6.

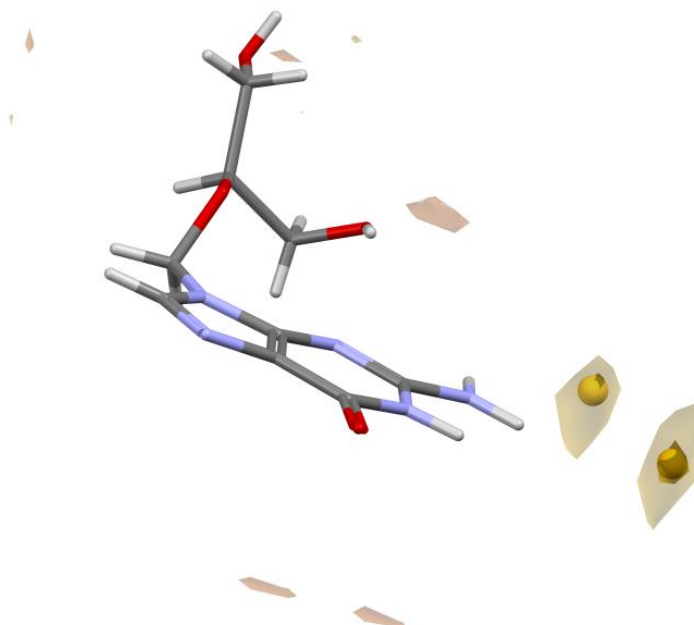

**Figure C7:** Full interaction map of form II with methyl carbon (yellow) and aromatic C-H (orange) probes, at levels 2, 4 and 6.

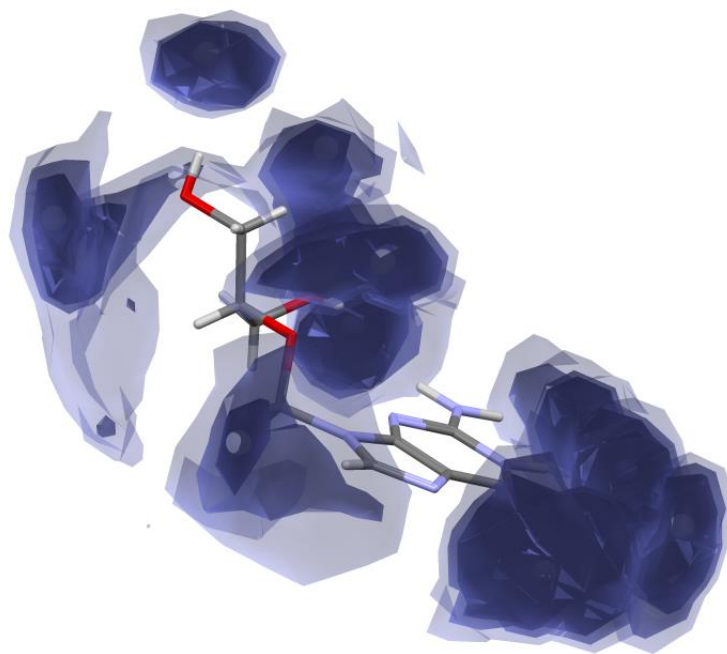

**Figure C8:** Full interaction Map of form II, with water oxygen as probe at levels 2, 4 and 6.

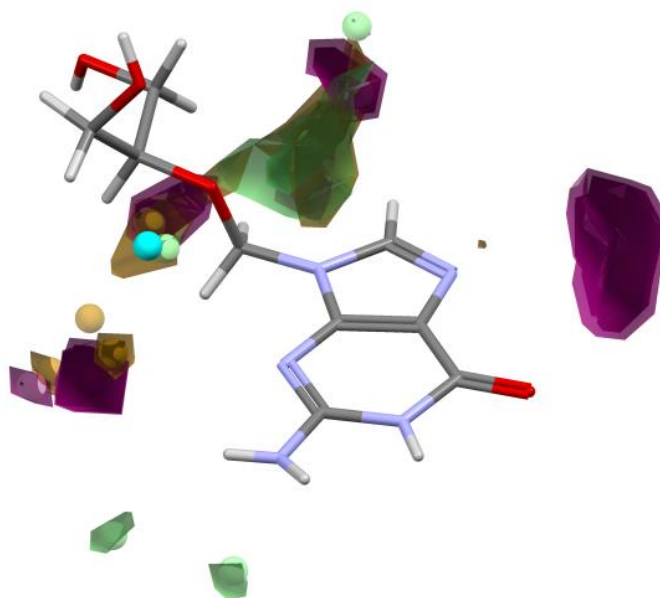

**Figure C9:** Full interaction map of form I with C-F (turquoise), C-Cl (light green), C-Br (brown) and C-I (violet) as probes, at different levels.

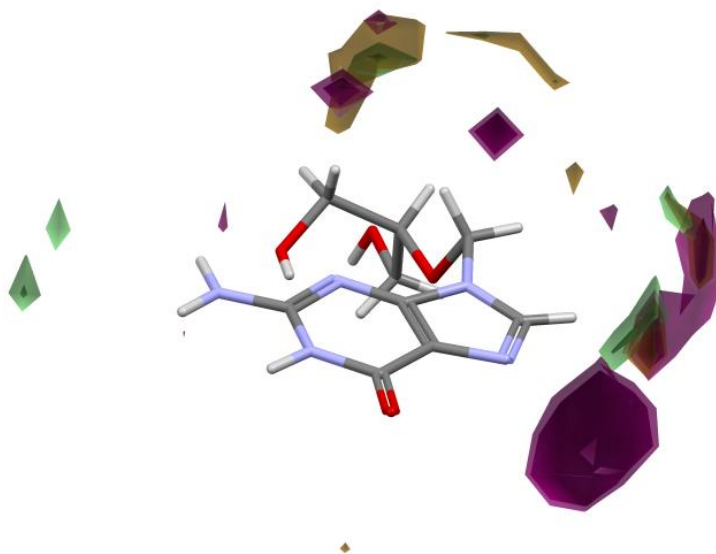

**Figure C10:** Full interaction map of form II with C-F (turquoise), C-Cl (light green), C-Br (brown) and C-I (violet) as probes, at different levels.

| Donor – H ... Acceptor | Frequency (%) |
|------------------------|---------------|
| O3 – H ... N3          | 18.0          |
| O4 – H ... O3          | 15.4          |
| N1 – H ... N5          | 30.9          |
| N2 – H ... O4          | 9.09          |
| N1 – H ... O2          | 16.9          |
| C4 – H ... O1          | 25.5          |
| C6 – H ... O1          | 22.2          |
| C9 – H ... O3          | 30.2          |

**Table C11:** The results of the motif search for the intermolecular contacts in form I.

| Donor – H ... Acceptor | Frequency (%) |
|------------------------|---------------|
| N2 – H ... N3          | 38.5          |
| N1 – H ... O1          | 41.3          |
| N1 – H ... O4          | 45.0          |
| O4 – H ... O1          | 12.6          |

**Table C12:** The results of the motif search for the intermolecular contacts in form II.

| Donor – H ... Acceptor | Contact length (Å) | Contact angle (°) |
|------------------------|--------------------|-------------------|
| O3 – H ... N3          | 1.923              | 172.05            |
| O4 – H ... O3          | 1.911              | 175.25            |
| N1 – H ... N5          | 2.153              | 179.37            |
| N2 – H ... O4          | 2.072              | 172.36            |
| N1 – H ... O2          | 2.342              | 142.54            |
| C4 – H ... O1          | 2.286              | 150.76            |
| C6 – H ... O1          | 2.467              | 133.92            |
| C9 – H ... O3          | 2.559              | 136.69            |

**Table C13:** Hydrogen bonds present in form I, as defined by PLATON. The numbering corresponds to that present in form I, as illustrated in figure 1a.

| Type           | Donor – H ... Acceptor | Contact length (Å) | Contact angle (°) |
|----------------|------------------------|--------------------|-------------------|
| Intermolecular | N2 – H ... N3          | 1.896              | 166.10            |
|                | N1 – H ... O1          | 1.924              | 161.71            |
|                | N1 – H ... O4          | 2.277              | 140.56            |
|                | O4 – H ... O1          | 2.123              | 150.96            |
| Intramolecular | O3 – H ... N5          | 2.549              | 135.90            |

**Table C14:** Hydrogen bonds present in form II, as defined by PLATON. The numbering corresponds to that present in form II, as illustrated in figure 1b. The contacts in form II seem to be more conventional than the ones present in the other anhydrous form, and this observation is also reflected in the frequencies of the motifs search.

## D. Supramolecular Analysis

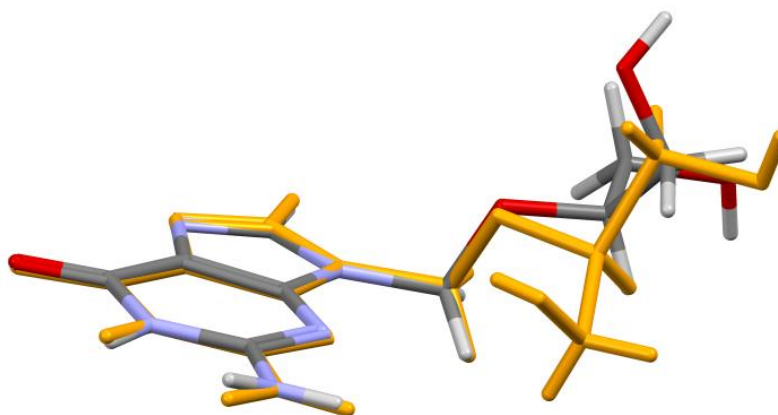

Figure D1: Overlay of structures in order to observe the difference between their configurations. Elemental colours: Form I and Orange structure: Form II. The molecular overlay tool confirmed that the two forms are a result of conformational polymorphism, because the RMSD of the molecule overlay, entailing one of each form, only decreased significantly after the rotation of one or two torsion angles.

| References | Comparison | Common molecules | Root Mean Square |
|------------|------------|------------------|------------------|
| UGIVAI     | ENEBUW     | 1 out of 15      | 1.449            |
| UGIVAI     | ENECAD     | 1 out of 15      | 1.276            |
| UGIVAI     | UGIVAI     | 15 out of 15     | 0.000            |
| UGIVAI01   | ENEBUW     | 1 out of 15      | 0.817            |
| UGIVAI01   | ENECAD     | 1 out of 15      | 1.097            |
| UGIVAI01   | UGIVAI01   | 15 out of 15     | 0.000            |
| UGIVAI01   | UGIVAI     | 1 out of 15      | 1.017            |

Table D3: Crystal Packing Similarity between form I and form II and the rest of the CSD.

## E. Hirshfeld Analysis

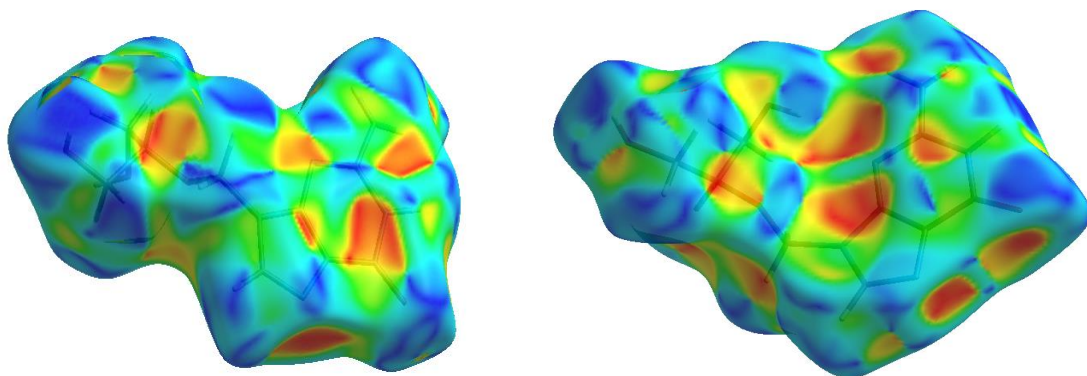

**Figure E1:** Shape index mapped on the Hirshfeld surface of: Left) Form I and Right) Form II. The contribution of C-H $\cdots\pi$  is shown through the relatively large indentations above the aromatic system on the shape index surface of the two forms.

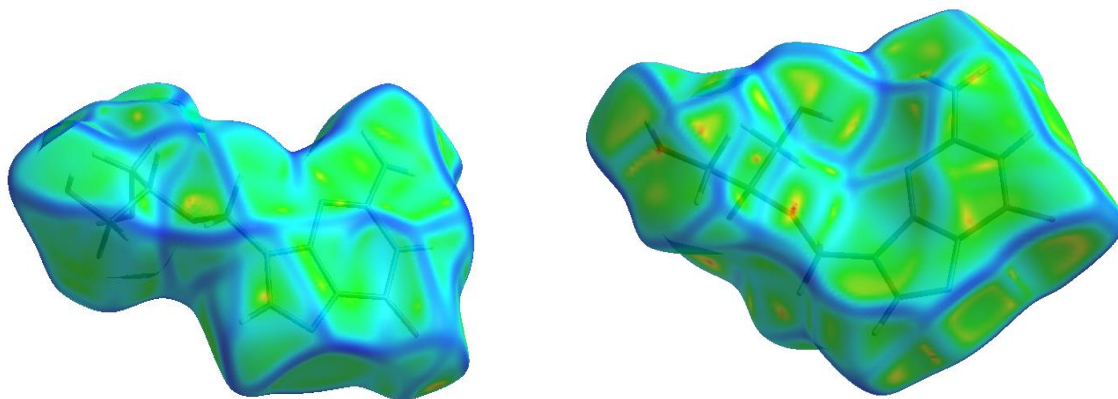

**Figure E2:** Curvedness Index mapped on the Hirshfeld surface of: Left) Form I and Right) Form II.



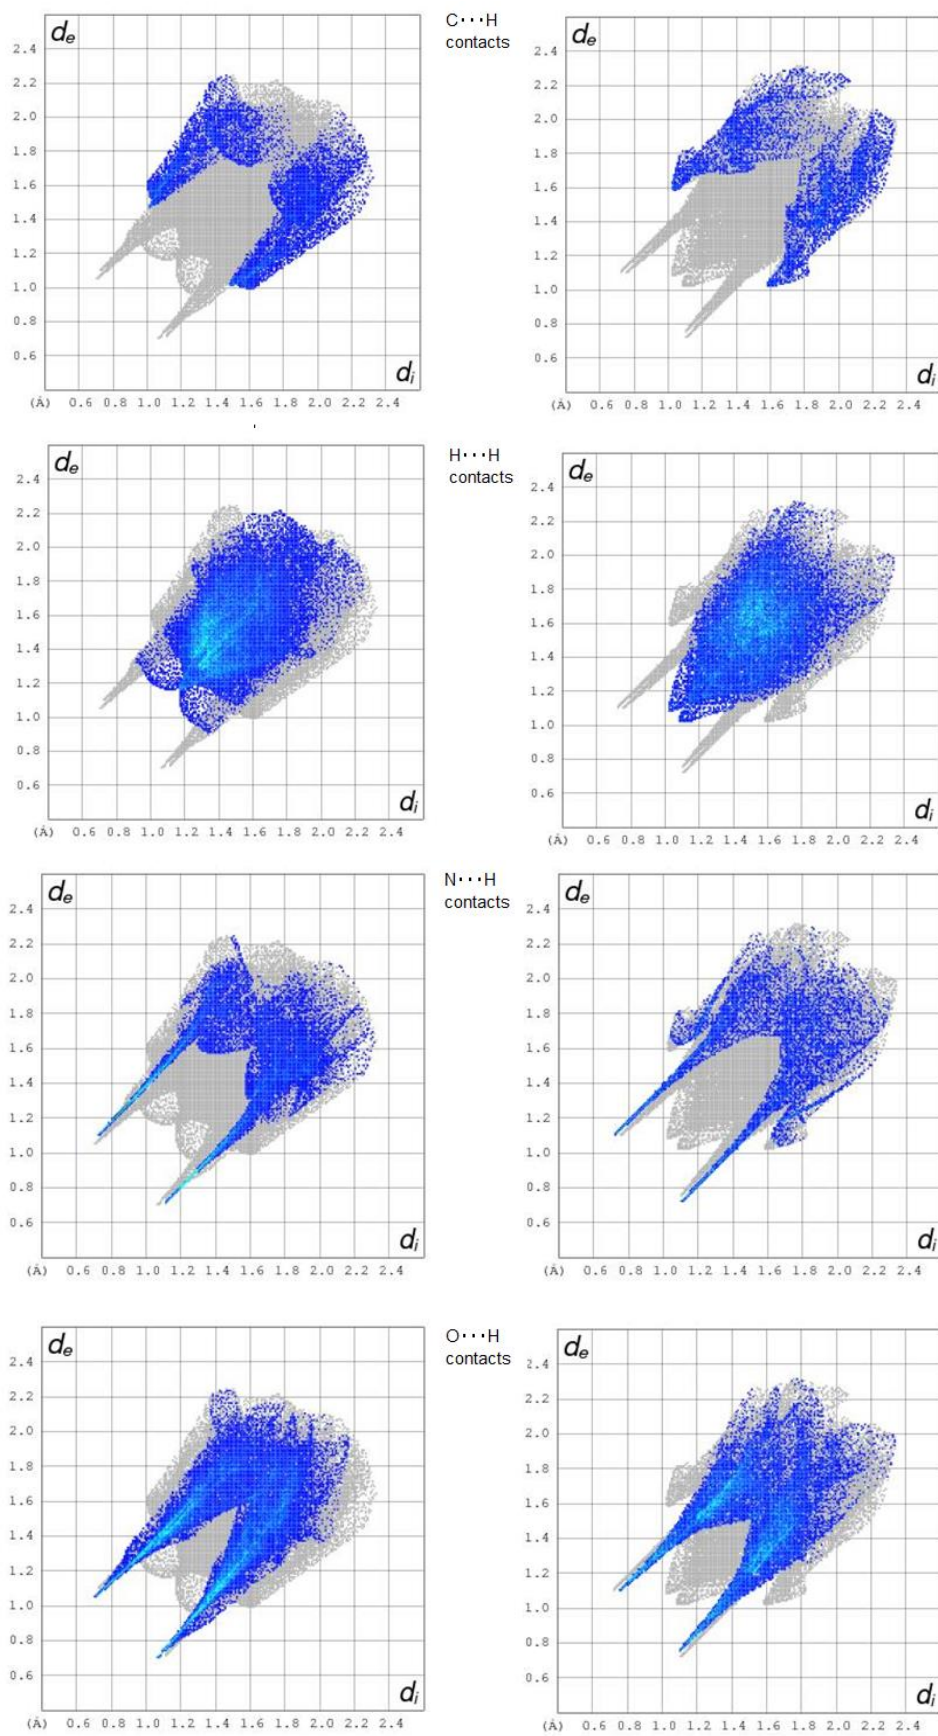

**Figure E3: Fingerprint plots of first column) Form I and second column) Form II.**



## F. Polymorph Assessment

The logistic regression model: *Hydrogen Bond Propensity*,  $\phi(z) = \frac{1}{1 + e^{-z}}$

The logit function,  $z = \gamma + \sum_k x_k \beta_k$

where,  $\gamma$  is the intercept,  $x$  is the predictor,  $\beta$  is the coefficient for each predictor and  $k$  is the number of predictors.<sup>149</sup>

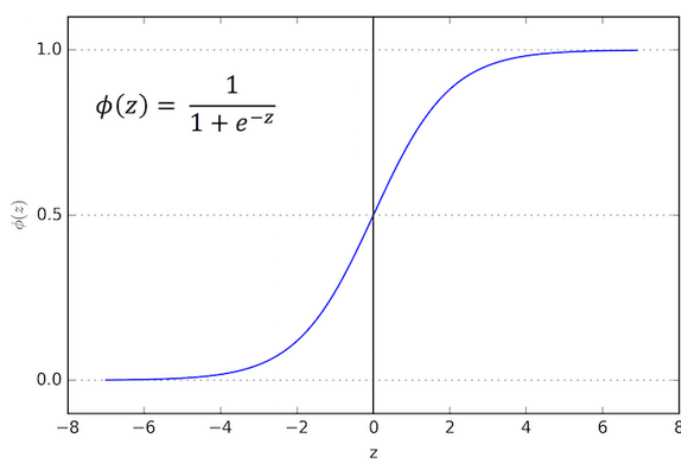

**Figure F1:** A curve showing the relationship between the logit function,  $z$  and the propensity. This can be useful during the interpretation of coefficients in relation to the hydrogen bond propensities.

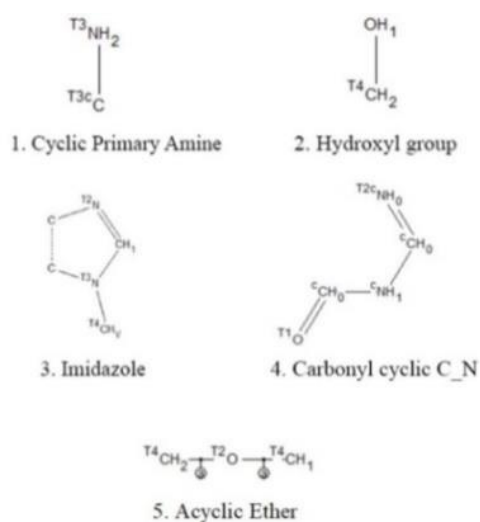

**Figure F2.** The substructures of ganciclovir, used for the HBP models.

|                 | Coefficients                          | Estimate | Sign. | Lower bound | Upper bound |
|-----------------|---------------------------------------|----------|-------|-------------|-------------|
|                 | Intercept                             | -0.787   | ***   | -1.034      | -0.544      |
| <b>Donor</b>    | Oxygen atom in hydroxyl group         | 0.829    | ***   | 0.629       | 1.032       |
|                 | Nitrogen in cyclic primary amine      | 1.997    | ***   | 1.791       | 2.207       |
|                 | Carbon atom in hydroxyl group         | -1.028   | ***   | -1.271      | -0.786      |
|                 | Nitrogen atom in carbonyl_cy C_N      | 0.494    | ***   | 0.275       | 0.716       |
|                 | Carbon atom in imidazole ring         | -0.186   | .     | -0.426      | 0.053       |
|                 | Carbon atom bonded to imidazole ring  | -0.033   | .     | -0.281      | 0.214       |
|                 | Other                                 | 2.298    | ***   | 2.117       | 2.484       |
| <b>Acceptor</b> | Nitrogen atom in cyclic primary amine | -2.654   | ***   | -2.953      | -2.371      |
|                 | Nitrogen atom in imidazole ring       | 0.194    | *     | 0.042       | 0.346       |
|                 | Nitrogen atom in carbonyl_cy C_N      | -0.573   | ***   | -0.758      | -0.391      |
|                 | Oxygen atom in acyclic ether          | -0.231   | *     | -0.409      | -0.054      |
|                 | Oxygen atom in carbonyl_cy C_N        | 1.012    | ***   | 0.854       | 1.171       |
|                 | Other                                 | 1.766    | ***   | 1.656       | 1.876       |
| <b>Other</b>    | Competition                           | 0.018    | ***   | 0.014       | 0.022       |
|                 | Donor steric density                  | -0.017   | ***   | -0.019      | -0.014      |
|                 | Acceptor steric density               | -0.023   | ***   | -0.026      | -0.020      |
|                 | Donor aromaticity                     | 0.258    | .     | -0.050      | 0.567       |
|                 | Acceptor aromaticity                  | 0.224    | .     | -0.079      | 0.529       |

**Table F3: The coefficients of the selected factors in the parsimonious model, together with their significance code, upper and lower bounds.**

#### **Goodness of fit data**

Area under ROC curve = 0.878

Null deviance: 24735.949 on 18201 degrees of freedom

Residual deviance: 15676.089 on 18183 degrees of freedom

| Donor | Acceptor | Propensity | Lower bound | Upper bound |
|-------|----------|------------|-------------|-------------|
| C7    | N5       | 0.91       | 0.91        | 0.91        |
| C6    | O3       | 0.90       | 0.90        | 0.90        |
| C6    | O4       | 0.90       | 0.90        | 0.90        |
| O3    | O4       | 0.81       | 0.81        | 0.81        |
| O4    | O3       | 0.81       | 0.81        | 0.81        |
| C6    | N5       | 0.73       | 0.73        | 0.73        |
| C4    | O2       | 0.32       | 0.32        | 0.32        |
| C8    | O4       | 0.32       | 0.32        | 0.32        |
| C9    | O3       | 0.32       | 0.32        | 0.32        |
| O3    | O2       | 0.19       | 0.19        | 0.19        |
| O4    | O2       | 0.19       | 0.19        | 0.19        |

**Table F4: The predicted intramolecular hydrogen bonding for both forms, with the atom numbering associated with form I. None of the predicted intramolecular contacts were observed by the model.**

**UGIVAI01**

| Atom (D/A)                  | = 0        | = 1      | = 2       | = 3       |
|-----------------------------|------------|----------|-----------|-----------|
| C4 of cyclic_n (d)          | 0          | 0        | 0         | 0         |
| C6 of acyclic_ether (d)     | 0          | 0        | 0         | 0         |
| C9 of acyclic_al_oh (d)     | 0          | 0        | 0         | 0         |
| N1 of cyclic_prim_amine (d) | 0.00671913 | 0.112477 | 0.769789  | 0.111015  |
| N2 of cyclic_amide (d)      | 0.0124012  | 0.960872 | 0.026727  | 0         |
| O3 of acyclic_al_oh (d)     | 0.0376089  | 0.905897 | 0.0564941 | 0         |
| O4 of acyclic_al_oh (d)     | 0.0435692  | 0.9042   | 0.0521708 | 0         |
| N3 of cyclic_n (a)          | 0.0558296  | 0.885105 | 0.0590651 | 0         |
| N5 of cyclic_n (a)          | 0.251052   | 0.729221 | 0.0197272 | 0         |
| O1 of cyclic_amide (a)      | 0.0229069  | 0.396671 | 0.550449  | 0.0299725 |
| O2 of acyclic_ether (a)     | 0.776348   | 0.223652 | 0         | 0         |
| O3 of acyclic_al_oh (a)     | 0.216116   | 0.733893 | 0.0499909 | 0         |
| O4 of acyclic_al_oh (a)     | 0.235037   | 0.71847  | 0.0464933 | 0         |

**Table F5: Coordination table of form I.**

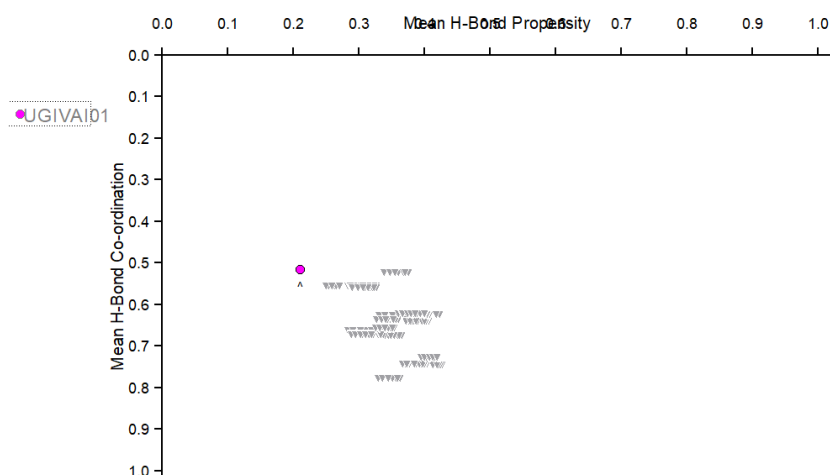

**Figure F6: The propensity participation chart output for form I (violet dot).**

| Donor                 | Acceptor              | Prop | Lower Bound | Upper Bound | I | II |
|-----------------------|-----------------------|------|-------------|-------------|---|----|
| N1 of primary amine   | O1 of carbonyl_cy C_N | 0.72 | 0.66        | 0.78        |   | ×  |
| N1 of primary amine   | O3 of hydroxyl group  | 0.52 | 0.45        | 0.58        |   |    |
| N1 of primary amine   | O4 of hydroxyl group  | 0.52 | 0.45        | 0.58        |   | ×  |
| N1 of primary amine   | N3 of imidazole ring  | 0.49 | 0.42        | 0.56        |   |    |
| O3 of hydroxyl group  | O1 of carbonyl_cy C_N | 0.45 | 0.38        | 0.53        |   |    |
| O4 of hydroxyl group  | O1 of carbonyl_cy C_N | 0.45 | 0.38        | 0.53        |   | ×  |
| N2 of carbonyl_cy C_N | O1 of carbonyl_cy C_N | 0.35 | 0.29        | 0.41        |   |    |
| N1 of primary amine   | O2 of acyclic ether   | 0.31 | 0.25        | 0.38        | × |    |
| N1 of primary amine   | N5 of carbonyl_cy C_N | 0.28 | 0.23        | 0.35        | × |    |
| O3 of hydroxyl group  | O3 of hydroxyl group  | 0.26 | 0.22        | 0.31        |   |    |
| O3 of hydroxyl group  | O4 of hydroxyl group  | 0.26 | 0.22        | 0.31        |   |    |
| O4 of hydroxyl group  | O3 of hydroxyl group  | 0.26 | 0.22        | 0.31        | × |    |
| O4 of hydroxyl group  | O4 of hydroxyl group  | 0.26 | 0.22        | 0.31        |   |    |
| O3 of hydroxyl group  | N3 of imidazole ring  | 0.24 | 0.19        | 0.30        | × |    |
| O4 of hydroxyl group  | N3 of imidazole ring  | 0.24 | 0.19        | 0.30        |   |    |
| C7 of acyclic ether   | O1 of carbonyl_cy C_N | 0.22 | 0.18        | 0.25        |   |    |
| N2 of carbonyl_cy C_N | O3 of hydroxyl group  | 0.18 | 0.15        | 0.23        |   |    |
| N2 of carbonyl_cy C_N | O4 of hydroxyl group  | 0.18 | 0.15        | 0.23        | × |    |

| Donor                 | Acceptor              | Prop | Lower Bound | Upper Bound | I | II |
|-----------------------|-----------------------|------|-------------|-------------|---|----|
| C4 of imidazole ring  | O1 of carbonyl_cy C_N | 0.18 | 0.14        | 0.24        | × |    |
| C6 of imidazole ring  | O1 of carbonyl_cy C_N | 0.17 | 0.13        | 0.23        | × |    |
| N2 of carbonyl_cy C_N | N3 of imidazole ring  | 0.17 | 0.13        | 0.21        |   | ×  |
| O3 of hydroxyl group  | O2 of acyclic ether   | 0.13 | 0.10        | 0.17        |   |    |
| O4 of hydroxyl group  | O2 of acyclic ether   | 0.13 | 0.10        | 0.17        |   |    |
| O3 of hydroxyl group  | N5 of carbonyl_cy C_N | 0.12 | 0.09        | 0.15        |   |    |
| O4 of hydroxyl group  | N5 of carbonyl_cy C_N | 0.12 | 0.09        | 0.15        |   |    |
| C7 of acyclic ether   | O3 of hydroxyl group  | 0.10 | 0.09        | 0.12        |   |    |
| C7 of acyclic ether   | O4 of hydroxyl group  | 0.10 | 0.09        | 0.12        |   |    |
| C8 of hydroxyl group  | O1 of carbonyl_cy C_N | 0.10 | 0.08        | 0.14        |   |    |
| C9 of hydroxyl group  | O1 of carbonyl_cy C_N | 0.10 | 0.08        | 0.14        |   |    |
| C7 of acyclic ether   | N3 of imidazole ring  | 0.09 | 0.08        | 0.11        |   |    |
| N2 of carbonyl_cy C_N | O2 of acyclic ether   | 0.09 | 0.07        | 0.12        |   |    |
| C4 of imidazole ring  | O3 of hydroxyl group  | 0.09 | 0.07        | 0.11        |   |    |
| C4 of imidazole ring  | O4 of hydroxyl group  | 0.09 | 0.07        | 0.11        |   |    |
| C6 of imidazole ring  | O3 of hydroxyl group  | 0.08 | 0.06        | 0.10        |   |    |
| C6 of imidazole ring  | O4 of hydroxyl group  | 0.08 | 0.06        | 0.10        |   |    |
| C4 of imidazole ring  | N3 of imidazole ring  | 0.08 | 0.06        | 0.10        |   |    |
| N2 of carbonyl_cy C_N | N5 of carbonyl_cy C_N | 0.08 | 0.06        | 0.10        |   |    |
| C6 of imidazole ring  | N3 of imidazole ring  | 0.07 | 0.05        | 0.10        |   |    |
| C7 of acyclic ether   | O2 of acyclic ether   | 0.05 | 0.04        | 0.06        |   |    |
| C8 of hydroxyl group  | O3 of hydroxyl group  | 0.04 | 0.03        | 0.06        |   |    |
| C8 of hydroxyl group  | O4 of hydroxyl group  | 0.04 | 0.03        | 0.06        |   |    |
| C9 of hydroxyl group  | O3 of hydroxyl group  | 0.04 | 0.03        | 0.06        | × |    |
| C9 of hydroxyl group  | O4 of hydroxyl group  | 0.04 | 0.03        | 0.06        |   |    |
| C7 of acyclic ether   | N5 of carbonyl_cy C_N | 0.04 | 0.03        | 0.05        |   |    |
| C8 of hydroxyl group  | N3 of imidazole ring  | 0.04 | 0.03        | 0.05        |   |    |
| C9 of hydroxyl group  | N3 of imidazole ring  | 0.04 | 0.03        | 0.05        |   |    |
| C4 of imidazole ring  | O2 of acyclic ether   | 0.04 | 0.03        | 0.05        |   |    |
| C6 of imidazole ring  | O2 of acyclic ether   | 0.04 | 0.03        | 0.05        |   |    |
| C4 of imidazole ring  | N5 of carbonyl_cy C_N | 0.03 | 0.02        | 0.05        |   |    |

|                      |                       |      |      |      |  |  |
|----------------------|-----------------------|------|------|------|--|--|
| C6 of imidazole ring | N5 of carbonyl_cy C_N | 0.03 | 0.02 | 0.04 |  |  |
| C8 of hydroxyl group | O2 of acyclic ether   | 0.02 | 0.01 | 0.03 |  |  |
| C9 of hydroxyl group | O2 of acyclic ether   | 0.02 | 0.01 | 0.03 |  |  |
| C8 of hydroxyl group | N5 of carbonyl_cy C_N | 0.02 | 0.01 | 0.02 |  |  |
| C9 of hydroxyl group | N5 of carbonyl_cy C_N | 0.02 | 0.01 | 0.02 |  |  |
|                      |                       |      |      |      |  |  |

**Table F7: The list of predicted intermolecular hydrogen bonds.**

The interactions with the highest propensities belonged to form II, with the maximum one involving the nitrogen atom of the amine group and the carbonyl oxygen. The strong potential of both respective participants was detected by the peaks of the electrostatic map and the intense full interaction maps surrounding both locations. Despite of the high potential of nitrogen in the amine group to act as a donor, the observed contacts in form I, involving such nitrogen were still of much lower probability, because they incorporated an ether oxygen and an aromatic nitrogen as acceptors. Due to the presence of very competitive functional groups, it was expected that any contact involving a carbon donor would have very small probability.
